# Supplementary material for: Arctiin-encapsulated DSPE-PEG bubble-like nanoparticles inhibit alveolar epithelial type 2 cell senescence to alleviate pulmonary fibrosis via the p38/p53/p21 pathway
Source: PubMed Central journal article supplement (PMC10043219; doi:10.3389/fphar.2023.1141800), 2023-03-14
Supplement: Presentation1.pdf [file Presentation1.pdf]

## Supplementary Information

### Figure S1. Bleomycin induces A549 senescence.

(A) A549 were treated with various BLM concentrations for 3 d. SA- $\beta$ -gal staining was applied to detect cellular senescence (original magnification, 400 $\times$ ). (B, C) The mRNA expression of aging-related markers (p16 and p21) was detected in A549 that was stimulated by various BLM concentrations for 3 d. (D) Western blot of aging-related markers (p16 and p21).

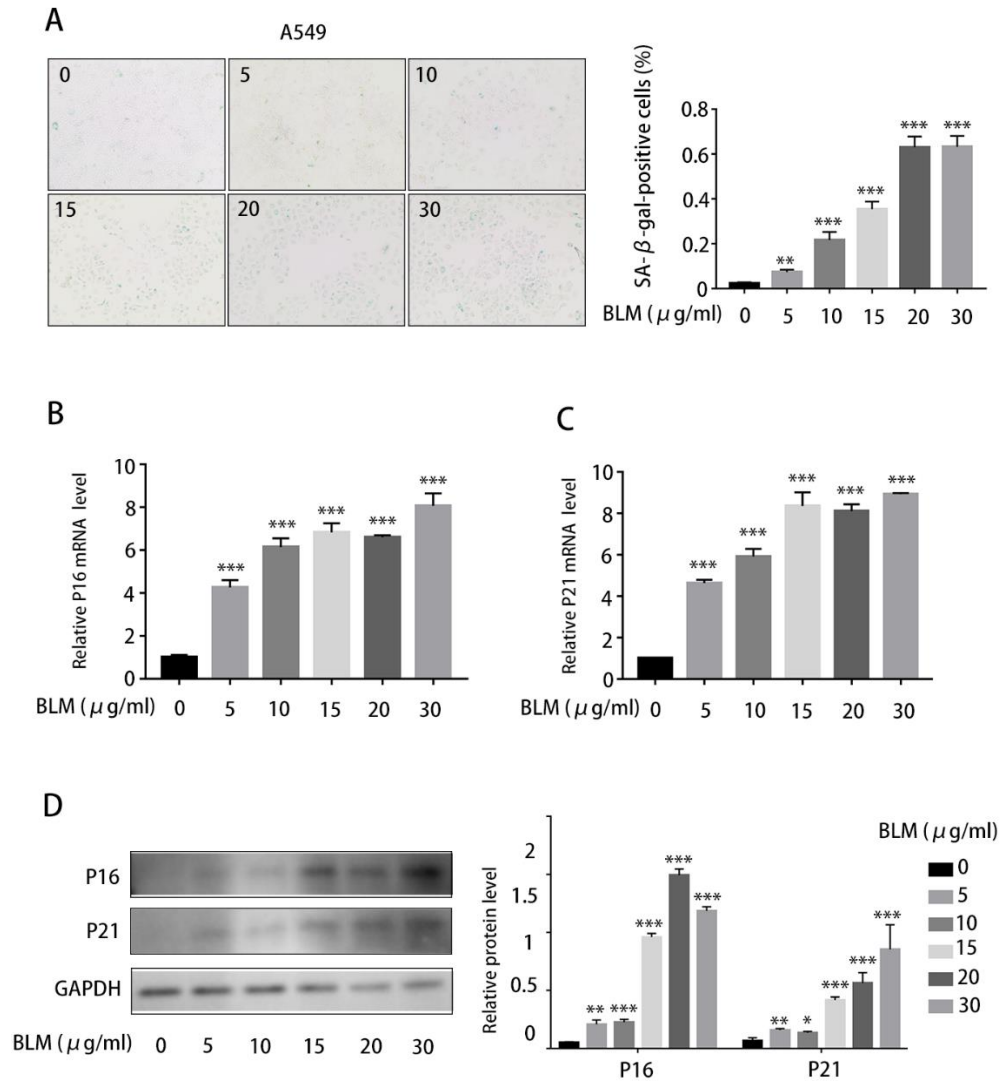

**Figure S2. Representative pictures of HE staining, Masson's staining, and IHC staining (p21 and p16) of normal lung tissue and IPF lung tissue (original magnification, 200 $\times$ ).**

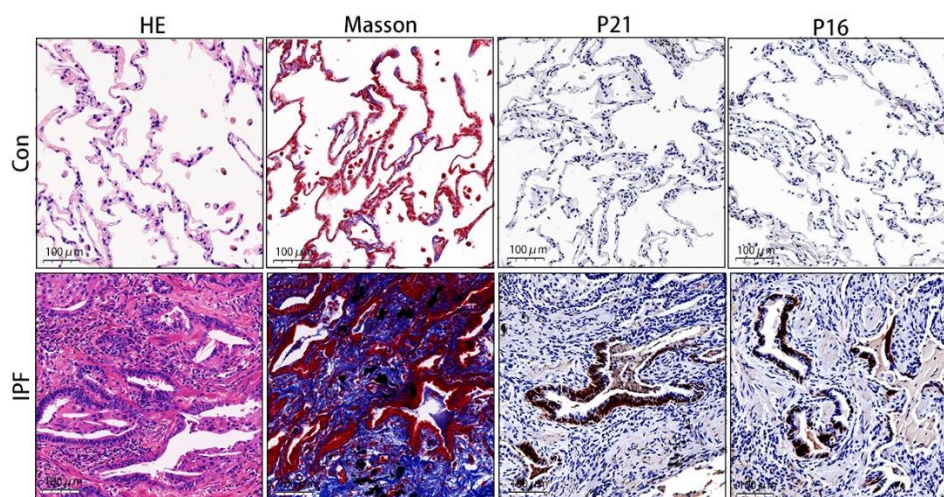

**Supplementary Table 1:** The information of the top 20 screened key genes between Fructus Arctii and IPF targets

| Target name | Degree | Betweenness | Closeness  |
|-------------|--------|-------------|------------|
| EGFR        | 32     | 525.9671    | 0.75       |
| CASP3       | 28     | 187.70872   | 0.6666667  |
| HSP90AA1    | 26     | 142.26202   | 0.6486486  |
| MMP9        | 23     | 168.72021   | 0.6233766  |
| ESR1        | 23     | 126.809044  | 0.61538464 |
| ERBB2       | 23     | 81.69875    | 0.61538464 |
| MDM2        | 19     | 31.325909   | 0.5925926  |
| MAPK1       | 19     | 71.10856    | 0.6        |
| MMP2        | 17     | 40.16694    | 0.57831323 |
| AR          | 16     | 12.986918   | 0.55172414 |
| PPARG       | 16     | 240.86961   | 0.5714286  |
| MAPK14      | 16     | 32.210052   | 0.5714286  |
| PTK2        | 15     | 39.398354   | 0.54545456 |
| APP         | 15     | 115.237045  | 0.5714286  |
| PARP1       | 14     | 46.74733    | 0.53333336 |
| NR3C1       | 14     | 77.62062    | 0.5647059  |
| MET         | 14     | 9.745526    | 0.53333336 |
| CTSB        | 11     | 36.151897   | 0.52747256 |
| TOP1        | 11     | 10.180686   | 0.5106383  |
| ESR2        | 10     | 0.32051283  | 0.5106383  |

**Supplementary Table 2:** The molecular docking of ARC and target proteins.

| Protein | Binding energy<br>(kcal/mol) | Center |   |   | Size |   |   |
|---------|------------------------------|--------|---|---|------|---|---|
|         |                              | x      | y | z | x    | y | z |
|         |                              |        |   |   |      |   |   |

|        |      |        |        |         |    |    |    |
|--------|------|--------|--------|---------|----|----|----|
| EGFR   | -7.6 | 3.379  | -7.086 | -0.742  | 30 | 30 | 30 |
| MAPK1  | -8.0 | -2.990 | 5.786  | 12.400  | 30 | 30 | 30 |
| PIK3CD | -6.5 | 39.582 | 13.893 | 33.832  | 30 | 30 | 30 |
| MAPK14 | -8.2 | -9.739 | -0.252 | -12.694 | 22 | 22 | 22 |
| MDM2   | -6.4 | 12.380 | 14.249 | 3.675   | 30 | 30 | 30 |
| ESR1   | -7.6 | -4.353 | 8.687  | 19.284  | 30 | 30 | 30 |
| MMP1   | -6.6 | 25.232 | 22.367 | 24.321  | 30 | 30 | 30 |
| CXCR2  | -6.8 | -1.117 | 0.930  | -7.627  | 30 | 30 | 30 |

---
